# Supplementary material
Source: PubMed Central journal article supplement (PMC6980331)
Supplement: NIHMS1064666-supplement-supp_info.pdf [file NIHMS1064666-supplement-supp_info.pdf]

## Supporting Information

### Characterization of an unusual gene cluster for a ribosomally-synthesized and post-translationally modified peptide

Liujie Huo<sup>a,b</sup>, Jeella Z. Acedo<sup>a</sup>, Xiling Zhao<sup>a</sup>, Paola Estrada<sup>c</sup>, Satish K. Nair<sup>a,c</sup>, and Wilfred A. van der Donk<sup>a,c\*</sup>

[a] Department of Chemistry and Howard Hughes Medical Institute, University of Illinois at Urbana-Champaign, 600 South Mathews Avenue, Urbana, IL 61801, USA

[b] Current address: Prof. Dr. L. Huo, State Key Laboratory for Microbial Technology (SKLMT), Institute of Microbial Technology, Helmholtz International Lab for Anti-infectives, Shandong University, Qingdao 266237, P. R. China

[c] Department of Biochemistry, University of Illinois at Urbana-Champaign, 600 South Mathews Avenue, Urbana, IL 61801, USA

\*To whom correspondence should be addressed: E-mail: [vddonk@illinois.edu](mailto:vddonk@illinois.edu);

phone: (217) 244-5360, fax:(217) 244-8533.

### Materials

All Chemicals were purchased from Sigma-Aldrich, Roche Biosciences or Fisher Scientific unless noted otherwise. All oligonucleotides were purchased from Integrated DNA Technologies and are shown in Table S1. Restriction endonucleases, DNA polymerases, dNTP solutions and a Gibson Assembly<sup>®</sup> Cloning Kit were purchased from New England Biolabs. Endoproteinase Glu-C was purchased from Roche Applied Science. Gel extraction, plasmid miniprep, and PCR purification kits were purchased from QIAGEN. Genomic DNA isolation kit (UltraClean<sup>®</sup> Microbial DNA isolation kit) was purchased from MO BIO Laboratories, Inc. Media components for bacterial cultures were purchased from Fisher Scientific. Protein Calibration Standard I and Peptide Calibration Standard II for MALDI-TOF MS were purchased from Bruker.

### Supplemental methods

#### General methods

For peptide residue numbering, positive residue numbers are used for amino acids in the core peptide counting forwards from the leader peptide cleavage site. Negative numbers are used for amino acids in the leader peptide counting backwards from the cleavage site. All polymerase chain reactions (PCR) were carried out on an automated thermocycler (C1000<sup>™</sup>, Bio-Rad).

Gibson assembly reaction solutions were made based on a published protocol.<sup>[1]</sup> DNA sequencing was performed by the Biotechnology Center at the University of Illinois at Urbana-Champaign (UIUC) and ACGT, Inc. Matrix-assisted laser desorption/ionization time-of-flight mass spectrometry (MALDI-TOF MS) analyses were carried out at the Mass Spectrometry Facility of UIUC on an UltrafleXtreme mass spectrometer (Bruker Daltonics). For MALDI-TOF MS analysis, samples were desalted using ZipTipC18 (Millipore) and spotted onto a MALDI target plate with a matrix solution containing 35 mg/mL 2,5-dihydroxybenzoic acid (DHB) in 3:2 MeCN/H<sub>2</sub>O with 0.1% trifluoroacetic acid (TFA) or 15 mg/mL sinapinic acid in 3:2 MeCN/H<sub>2</sub>O with 0.1% TFA. Peptides were desalted by using a C4 solid-phase extraction (SPE) column and further purified by preparative reversed-phase high performance liquid chromatography (RP-HPLC) on a Delta 600 instrument (Waters) equipped with a Phenomenex C18 column at a flow rate of 8 mL/min. For RP-HPLC, solvent A was 0.1% TFA in H<sub>2</sub>O and solvent B was 4:1 MeCN/H<sub>2</sub>O containing 0.086% TFA. An elution gradient from 0% solvent B to 100% solvent B over 45 min was used unless specified otherwise. Liquid chromatography electrospray ionization tandem mass spectrometry (LC/ESI-Q/TOF-MS/MS) was carried out and processed using a Synapt ESI quadrupole ToF Mass Spectrometry System (Waters) equipped with an Acquity Ultra Performance Liquid Chromatography (UPLC) system (Waters).

### **Strains and plasmids**

*Lachnospiraceae* bacterium C6A11 was obtained from Dr. William Kelly (AgResearch, New Zealand). *E. coli* DH5 $\alpha$  and *E. coli* NEB<sup>®</sup> Turbo was used as host for cloning and plasmid propagation and *E. coli* BL21 (DE3) was used as host for expression of proteins and peptides. Co-expression vectors pRSFDuet-1 and pETDuet-1 were obtained from Novagen.

### **Culturing *Lachnospiraceae* bacterium C6A11 and genomic DNA isolation**

Anaerobic culture of *Lachnospiraceae* bacterium C6A11 was performed in the same way as described for *Ruminococcus flavefaceins* FD-1.<sup>[2]</sup> Liquid RM02 and agar *L. bacterium* C6A11 slants were kindly provided by Dr. William Kelly's laboratory and the liquid cultures were transferred to fresh media and allowed to incubate for 4-5 days. Upon establishment of an active *L. bacterium* C6A11 culture, the supernatant and cells were monitored for any potential products and gDNA was isolated using a MoBio kit, as per the manufacturer's instructions.

### **Cloning and expression of LahA substrates**

All LahA substrates were cloned, expressed, and purified in this study in the way described previously.<sup>[3]</sup>

### **Construction of pRSFDuet-1 derivatives for co-expression with untagged LahM1/M2 and His<sub>6</sub>-LahAs**

The gene encoding LahS<sub>B</sub> harboring flanking sequences homologous to pRSFDuet-1 multiple cloning site 2 was first amplified via PCR using genomic DNA of *Lachnospiraceae* bacterium C6A11 as template and primers LahM1/M2-mcsII-up and LahM1/M2-mcsII-dn (Table S1). Subsequently, the PCR fragment was cloned into the multiple cloning site 2 of the pRSFDuet-1 vector (without His tag) linearized by *Nde*I using Gibson assembly to generate the pRSFDuet-1/LahM1/M2-2 vectors. The genes encoding LahAs harboring flanking sequences homologous to pRSFDuet-1 multiple cloning site 1 were then amplified using corresponding primers (Table S1). Then the corresponding fragments were cloned into the multiple cloning site 1 (MCS1) of the pRSFDuet-1/LahM1/M2-2 vectors (thus providing the LahA peptides with a His tag) linearized by *Eco*RI using Gibson assembly to generate pRSFDuet-1/His-LahAs/LahM1 and pRSFDuet-1/His-LahAs/LahM2.

### **Construction of pRSFDuet-1 derivatives for co-expression of LahS<sub>B</sub> and His<sub>6</sub>-LahAs**

The gene encoding LahS<sub>B</sub> harboring flanking sequences homologous to pRSFDuet-1 multiple cloning site 2 was first amplified via PCR using genomic DNA of *Lachnospiraceae bacterium* C6A11 as template and primers LahS<sub>B</sub>-mcsII-up and LahS<sub>B</sub>-mcsII-dn (Table S1). Subsequently the PCR fragment was cloned into the multiple cloning site 2 of the pRSFDuet-1 vector (without His tag) linearized by *NdeI* using Gibson assembly to generate the pRSFDuet-1/LahS<sub>B</sub>-2 vector. The genes encoding LahAs harboring flanking sequences homologous to pRSFDuet-1 multiple cloning site 1 were then amplified using corresponding primers (Table S1). Then the corresponding fragments were cloned into the multiple cloning site 1 (MCS1) of the pRSFDuet-1/LahS<sub>B</sub>-2 vector (thus providing the LahA peptides with a His tag) linearized by *EcoRI* using Gibson assembly to generate pRSFDuet-1/His-LahAs/LahS<sub>B</sub>.

### **Construction of pET28a derivative for expression of His<sub>6</sub>-MBP-LahS<sub>B</sub>/M1/M2**

The gene encoding LahS<sub>B</sub> /M1/M2 sequence with homologous arms to pET28a-MBP<sup>[4]</sup> multiple cloning site 1 was first amplified using genomic DNA of *Lachnospiraceae bacterium* C6A11 as template and corresponding primers (Table S1) and cloned into the multiple cloning site of the pET28a-MBP vector linearized by *BamHI* using Gibson assembly to generate pETMBP-LahS<sub>B</sub>, pETMBP-LahM1 and pETMBP-LahM2.

### **Co-expression of LahM1/M2 and LahAs in *E. coli* BL21 (DE3)**

*E. coli* BL21 (DE3) cells were transformed with pRSFDuet-1/His-LahAs/LahM1 and pRSFDuet-1/His-LahAs/LahM2 and plated on a Luria Broth (LB) agar plate containing 50 mg/L kanamycin. A single colony was picked and grown in 15 mL of TB amended with 10 mM MgCl<sub>2</sub>, 50 mg/L kanamycin at 37 °C for 15 h, and the resulting culture was used to inoculate 1.5 L of TB medium containing 50 mg/L kanamycin amended with 10 mM MgCl<sub>2</sub>. Cells were cultured at 37 °C until the OD<sub>600</sub> reached 0.6 and cooled on ice for 30 min. Subsequently IPTG was added to a final concentration of 0.7 mM. The cells were cultured at 18 °C for another 18 h before harvesting.

### **Expression of His-MBP-LahM1 and His-MBP-LahM2 in *E. coli* BL21 (DE3)**

*E. coli* BL21 (DE3) cells were transformed with pETMBP-LahM1 or pETMBP-LahM2 and plated on a Luria Broth (LB) agar plate containing 50 mg/L kanamycin. A single colony was picked and grown in 15 mL of LB with 50 mg/L kanamycin at 37 °C for 15 h, and the resulting culture was used to inoculate 3 L of LB medium containing 50 mg/L kanamycin. Cells were cultured at 37 °C until the OD<sub>600</sub> reached 0.6 and cooled on ice for 30 min. Subsequently IPTG was added to a final concentration of 0.3 mM. The cells were cultured at 16 °C for another 18 h before harvesting.

### **Co-expression of LahS<sub>B</sub> and LahAs in *E. coli* BL21 (DE3)**

*E. coli* BL21 (DE3) cells were transformed with pRSFDuet-LahAs-LahS<sub>B</sub> and plated on a Luria Broth (LB) agar plate containing 50 mg/L kanamycin. A single colony was picked and grown in 15 mL of TB amended with 10 mM MgCl<sub>2</sub> and 50 mg/L kanamycin at 37 °C for 15 h, and the resulting culture was used to inoculate 1.5 L of TB medium containing 50 mg/L kanamycin amended with 10 mM MgCl<sub>2</sub>. Cells were cultured at 37 °C until the OD<sub>600</sub> reached 0.6 and cooled on ice for 30 min. Subsequently IPTG was added to a final concentration of 0.7 mM. The cells were cultured at 18 °C for another 18 h before harvesting.

### **Purification of modified His<sub>6</sub>-LahAs**

The cell pellets were resuspended at room temperature in LanA start buffer (20 mM NaH<sub>2</sub>PO<sub>4</sub>, pH 7.5 at 25 °C, 500 mM NaCl, 0.5 mM imidazole, 20% glycerol) and lysed using a high pressure homogenizer (Avestin, Inc.). The sample was centrifuged at 23,700×g for 30 min, and the

supernatant was kept. The pellets were then resuspended in LanA buffer 1 (6 M guanidine hydrochloride, 20 mM NaH<sub>2</sub>PO<sub>4</sub>, pH 7.5 at 25 °C, 500 mM NaCl, 0.5 mM imidazole) and lysed again. The insoluble portion was removed by centrifugation at 23,700 g for 30 min, and the soluble portion was kept. Both soluble portions were combined and passed through 0.45- $\mu$ m syringe filters (Fisherbrand®), and the His<sub>6</sub>-tagged modified peptides were purified by immobilized metal affinity chromatography (IMAC) as previously described.<sup>[5]</sup> The eluted fractions were desalted by preparative reversed phase (RP) HPLC using a Waters Delta-pak C4 column (15  $\mu$ m; 300 Å; 25 mm  $\times$  100 mm). The desalted peptides were lyophilized and stored at -20 °C.

### **Expression of His-MBP-LahS<sub>B</sub> in *E. coli* BL21 (DE3)**

*E. coli* BL21 (DE3) cells were transformed with pETMBP-LahS<sub>B</sub> and plated on a Luria Broth (LB) agar plate containing 50 mg/L kanamycin. A single colony was picked and grown in 15 mL of LB with 50 mg/L kanamycin at 37 °C for 15 h, and the resulting culture was used to inoculate 3 L of LB medium. Cells were cultured at 37 °C until the OD<sub>600</sub> reached 0.6 and cooled on ice for 30 min. Subsequently IPTG was added to a final concentration of 0.3 mM. The cells were cultured at 18 °C for another 18 h before harvesting.

### **Purification of His-MBP-LahM1 and His-MBP-LahM2**

All steps were performed at 4 °C in a cold room or on ice. The cell pellets were resuspended in buffer A (20 mM Tris, 1 M NaCl, pH 7.8 at 25 °C) and lysed using a high pressure homogenizer (Avestin, Inc.). The sample was centrifuged at 23,700 $\times$ g for 30 min. The supernatant was passed through 0.45- $\mu$ m syringe filters (Fisherbrand®) and loaded onto a 5 mL HisTrap IMAC column pre-charged with Ni<sup>2+</sup> and equilibrated with buffer A. The column was attached to an ÄKTA fast protein liquid chromatography (FPLC) system (GE Healthcare) and further washed with up to 25% buffer B (20 mM Tris, 1 M NaCl, 500 mM imidazole, pH 7.8 at 25 °C) in buffer A at a flow rate of 1.5 mL/min. Then the protein was eluted using a gradient of 25-100% buffer B. UV absorbance at 280 nm was monitored and fractions were collected and analyzed by SDS-PAGE (Bio-Rad). The fractions containing the desired proteins were combined and exchanged back to buffer A using a PD-10 desalting column (GE Healthcare) and subsequently concentrated using an Amicon Ultra-15 Centrifugal Filter Unit (Millipore). Protein aliquots were frozen in liquid nitrogen and stored at -80 °C. The protein purification procedure was monitored by SDS-PAGE (Figure S3).

### **Size exclusion chromatography (SEC) of His-MBP-LahM1 and His-MBP-LahM2**

Fractions containing the highest purity protein, as judged by Coomassie-stained SDS-PAGE (Figure S3), were pooled and further purified by size exclusion chromatography (Superdex Hiload 200 16/60, GE Healthcare) in 1 M NaCl, 20 mM Tris, pH 7.5 buffer. The purified protein was concentrated using Amicon Ultra-4 centrifugal filters (30 kDa molecular weight cut-off, Millipore) and stored in liquid nitrogen until needed. The final concentration was quantified by Bradford analysis (Thermo Scientific).

### **Purification of His-MBP-LahS<sub>B</sub>**

All steps were performed at 4 °C in a cold room or on ice. The cell pellets were resuspended in buffer A (20 mM Tris, 1 M NaCl, pH 7.8 at 25 °C) and lysed using a high pressure homogenizer (Avestin, Inc.). The sample was centrifuged at 23,700 $\times$ g for 30 min. The supernatant was passed through 0.45- $\mu$ m syringe filters (Fisherbrand®) and loaded onto a 5 mL HisTrap IMAC column pre-charged with Ni<sup>2+</sup> and equilibrated with buffer A. The column was attached to an ÄKTA fast protein liquid chromatography (FPLC) system (GE Healthcare) and further washed with up to 25% buffer B (20 mM Tris, 1 M NaCl, 500 mM imidazole, pH 7.8 at 25 °C) in buffer A at a flow rate of 1.5 mL/min. Then the protein was eluted using a gradient of 25-100% buffer B over 45

min. UV absorbance at 280 nm was monitored and fractions were collected and analyzed by SDS-PAGE (Bio-Rad). The fractions containing the desired proteins were combined and exchanged back to buffer A using a PD-10 desalting column (GE Healthcare) and subsequently concentrated using an Amicon Ultra-15 Centrifugal Filter Unit (Millipore). Protein aliquots were frozen in liquid nitrogen and stored at -80 °C. The protein purification was monitored by SDS-PAGE (Figure S4).

### **Peptide Synthesis**

A 15-mer peptide corresponding to the C-terminus of LahA3 was synthesized using standard fluorenylmethyloxycarbonyl (Fmoc) solid phase peptide synthesis (SPPS) performed on a CEM Liberty Microwave Peptide Synthesizer (CEM Corporation), following the instrument's standard wash procedures. The synthesis was performed in 0.1 mmol scale, with the use of Fmoc-Val-Wang resin (Novabiochem, Merck) that has a loading capacity of 0.69 mmol/g. Fmoc-amino acids (0.2 M in dimethylformamide, DMF) were coupled using HCTU (0.5 M in DMF) as coupling reagent and *N,N*-diisopropylethylamine (2 M in 1-methyl-2-pyrrolidinone) as activator base. Fmoc deprotection was accomplished using 20% piperidine in DMF. Peptides were then cleaved from the resin by mixing with a solution of 95:2.5:2.5 trifluoroacetic acid (TFA):triisopropylsilane (TIPS):H<sub>2</sub>O for 2 h at room temperature. The solution was filtered into 10 mL of cold diethyl ether to precipitate the peptides. The sample was centrifuged (4,500×g) for 10 min and washed twice with 10 mL of cold diethyl ether. The pelleted crude peptide was dried, redissolved in 20% acetonitrile with 0.1% TFA, and purified by preparative RP-HPLC on a Vydac C18 column (10 μm particle size, 300 Å pore size, 2.2×25 cm). A water-acetonitrile solvent system with 0.1% TFA was used. Solvent B (acetonitrile with 0.1% TFA) was programmed to increase from 2 to 100% in 45 min. The detector was set at 220 nm and the flow rate was 10 mL/min. The collected fractions were monitored by MALDI-TOF MS. Purified peptides were lyophilized and stored at -20 °C.

## Supporting Tables and Figures

**Table S1.** Primers used in this study

| Primer Name                      | Primer Sequences (5' – 3')                                         |
|----------------------------------|--------------------------------------------------------------------|
| Primers for cloning <i>lahAs</i> | See Ref. 3                                                         |
| LahM1-up-MCSII                   | TAGTTAAGTATAAGAAGGAGATATACATATGAAGCAG<br>AATGAATTCTACGATTATATAT    |
| LchM1-dn-MCSII                   | TTCGCAGCAGCGGTTTCTTTACCAGATTATGTTAATT<br>CCTCCTTAGTTTTTTTTATTGC    |
| LahM2-up-MCSII                   | TAGTTAAGTATAAGAAGGAGATATACATATGAACTTA<br>ACACTGAAGCAATGGCTGGAGC    |
| LchM2-dn-MCSII                   | AATTTTCGCAGCAGCGGTTTCTTTACCAGATTACTTC<br>GACAGCCATCCCAAAAATAAAACC  |
| LahS <sub>B</sub> -up-MCSII      | TAGTTAAGTATAAGAAGGAGATATACATGAGAAATAT<br>AAGCTTATGGAGAAAGAGAT      |
| LchS <sub>B</sub> -dn-MCSII      | AATTTTCGCAGCAGCGGTTTCTTTACCAGATTACCTC<br>TGTTTATTGCAAATACCTGT      |
| LahM1-up-MBP                     | AACCTGTACTIONCCAATCCGGATCCCTCGAGAAGCA<br>GAATGAATTCTACGATTATATATCC |
| LahM1-dn-MBP                     | GTGGTGGTGGTGCTCGAGTGCGGCCGTTATGTTAA<br>TTCCTCCTTAGTTTTTTTTATTGC    |
| LahM2-up-MBP                     | CCTGTACTIONCCAATCCGGATCCCTCGAGATGAACTT<br>AACACTGAAGCAATGGCTGGAGC  |
| LahM2-dn-MBP                     | GTGGTGGTGGTGCTCGAGTGCGGCCGTTACTTCG<br>ACAGCCATCCCAAAAATAAAACC      |
| LahS <sub>B</sub> -up-MBP        | CCTGTACTIONCCAATCCGGATCCCTCGAGGAGAAATA<br>TAAGCTTATGGAGAAAGAGATT   |
| LahS <sub>B</sub> -dn-MBP        | GTGGTGGTGGTGCTCGAGTGCGGCCGTTACCTCT<br>GTTTATTGCAAATACCTGTTA        |

**Table S2.** List of masses of the ions shown in Figure 3.

| species                                                              | Calculated masses          | Observed masses | Errors (ppm) |
|----------------------------------------------------------------------|----------------------------|-----------------|--------------|
| unmodified His-LahA3, [M+H] <sup>+</sup>                             | 12479.50<br>(average mass) | 12479.8         | 20           |
| 2-fold dehydrated His-LahA3, [M+H] <sup>+</sup>                      | 12443.50<br>(average mass) | 12443.7         | 18           |
| Tandem MS fragments                                                  |                            |                 |              |
| Parent ion: 2-fold dehydrated LahA3 core peptide, [M+H] <sup>+</sup> | 2704.35976                 | 2704.3705       | 4.0          |
| y5                                                                   | 404.2140                   | 404.2208        | 16.8         |
| y6                                                                   | 491.2461                   | 491.2509        | 9.8          |
| y8                                                                   | 633.3203                   | 633.3250        | 7.5          |
| y9                                                                   | 732.3887                   | 732.3969        | 11.2         |
| b7                                                                   | 790.3466                   | 790.3651        | 23.5         |
| y10                                                                  | 845.4728                   | 845.4785        | 6.8          |
| b8                                                                   | 903.4306                   | 903.4377        | 7.9          |
| b9                                                                   | 1016.5147                  | 1016.5179       | 3.2          |
| b10                                                                  | 1147.5552                  | 1147.5641       | 7.8          |
| y12                                                                  | 985.5419                   | 985.5480        | 6.2          |
| y14                                                                  | 1155.6474                  | 1155.6593       | 10.3         |
| b11                                                                  | 1262.5821                  | 1262.5962       | 11.2         |
| y15                                                                  | 1302.7158                  | 1302.7282       | 9.5          |
| b12                                                                  | 1319.6036                  | 1319.6143       | 8.1          |
| b13                                                                  | 1402.6513                  | 1402.6619       | 7.6          |
| b14                                                                  | 1549.7197                  | 1549.7339       | 9.2          |
| y19                                                                  | 1688.8524                  | 1688.8614       | 5.3          |
| b15                                                                  | 1662.8037                  | 1662.8160       | 7.4          |
| b17                                                                  | 1788.8572                  | 1788.8755       | 10.2         |
| y20                                                                  | 1801.9365                  | 1801.9556       | 10.6         |
| y25                                                                  | 2389.1803                  | 2389.1975       | 7.2          |
| b25                                                                  | 2459.2222                  | 2459.2328       | 4.3          |
| b26                                                                  | 2516.2437                  | 2516.2643       | 8.2          |
| b27                                                                  | 2587.2808                  | 2587.3046       | 9.2          |
| b28                                                                  | 2686.3492                  | 2686.3607       | 4.3          |

**Table S3.** List of masses of the ions shown in Figure 4.

| species                                                                          | Calculated masses       | Observed masses | Errors (ppm) |
|----------------------------------------------------------------------------------|-------------------------|-----------------|--------------|
| unmodified His-LahA5, [M+H] <sup>+</sup>                                         | 12759.03 (average mass) | 12759.2         | 12           |
| 3-fold dehydrated His-LahA5, [M+H] <sup>+</sup>                                  | 12705.03 (average mass) | 12705.3         | 17           |
| mono-phosphorylated His-LahA5, [M+H] <sup>+</sup>                                | 12839.01 (average mass) | 12839.2154      | 16           |
| mono-phosphorylated and 3-fold dehydrated LahA5 core peptide, [M+H] <sup>+</sup> | 12785.01 (average mass) | 12785.2913      | 22           |
| Tandem MS fragments                                                              |                         |                 |              |
| Parent ion: 3-fold dehydrated LahA5 core peptide, [M+H] <sup>+</sup>             | 2079.1836               | 2079.2009       | 8.3          |
| y1                                                                               | 150.0584                | 150.0598        | 9.6          |
| y2                                                                               | 221.0955                | 221.0977        | 10.2         |
| b9                                                                               | 242.1500                | 242.1527        | 11.5         |
| y3                                                                               | 308.1275                | 308.1299        | 7.6          |
| y5                                                                               | 508.2436                | 508.2479        | 8.4          |
| b13                                                                              | 594.3716                | 594.3747        | 5.3          |
| b14                                                                              | 695.4193                | 695.4241        | 6.9          |
| b15                                                                              | 778.4669                | 778.4726        | 7.3          |
| y6                                                                               | 621.3277                | 621.3330        | 8.5          |
| b16                                                                              | 877.5354                | 877.5435        | 9.3          |
| b17                                                                              | 948.5725                | 948.5788        | 6.7          |
| b18                                                                              | 1017.6045               | 1017.6149       | 10.2         |
| b19                                                                              | 1116.6729               | 1116.6858       | 11.5         |
| b20                                                                              | 1187.7100               | 1187.7212       | 9.4          |
| b21                                                                              | 1258.7471               | 1258.7557       | 6.8          |
| b24                                                                              | 1571.9473               | 1571.9523       | 3.2          |
| y17                                                                              | 1598.9034               | 1598.9138       | 6.5          |
| b25                                                                              | 1658.9793               | 1658.9931       | 8.3          |
| b26                                                                              | 1772.0634               | 1772.0795       | 9.1          |
| y20                                                                              | 1838.0409               | 1838.0597       | 10.2         |
| b27                                                                              | 1859.0954               | 1859.1186       | 12.5         |
| b28                                                                              | 1930.1325               | 1930.1588       | 13.6         |
| b29                                                                              | 2061.1730               | 2061.1959       | 11.1         |



**Table S4.** List of masses of the ions shown in Figure 5A-D.

| species                                                                      | Calculated masses          | Observed masses | Errors (ppm) |
|------------------------------------------------------------------------------|----------------------------|-----------------|--------------|
| unmodified His-LahA5, [M+H] <sup>+</sup>                                     | 12759.03<br>(average mass) | 12759.4         | 26           |
| mono-methylated His-LahA5, [M+H] <sup>+</sup>                                | 12773.03<br>(average mass) | 12773.3         | 19           |
| 3-fold dehydrated LahA5 core peptide, [M+H] <sup>+</sup>                     | 2079.1836                  | 2079.2025       | 9.1          |
| 3-fold dehydrated and mono-methylated LahA5 core peptide, [M+H] <sup>+</sup> | 2093.1836                  | 2093.1932       | 4.6          |

**Table S5.** List of masses of the ions shown in Figure 5E.

| species                         | Calculated masses | Observed masses | Errors (ppm) |
|---------------------------------|-------------------|-----------------|--------------|
| Parent ions, [M+H] <sup>+</sup> | 2093.1836         | 2093.1903       | 3.2          |
| y1                              | 164.0584          | 164.0619        | 21.3         |
| b3                              | 242.15            | 242.1519        | 7.8          |
| y5                              | 522.2436          | 522.2498        | 11.9         |
| y6                              | 635.3277          | 635.3308        | 4.9          |
| b7                              | 594.3716          | 594.3794        | 13.1         |
| b8                              | 695.4193          | 695.4227        | 4.9          |
| b9                              | 778.467           | 778.4702        | 4.1          |
| b10                             | 877.5354          | 877.5412        | 6.6          |
| b11                             | 948.5725          | 948.5803        | 8.2          |
| b12                             | 1017.6045         | 1017.6128       | 8.2          |
| y12                             | 1145.6184         | 1145.6309       | 10.9         |
| y13                             | 1216.6555         | 1216.6758       | 16.7         |
| b21                             | 1859.0954         | 1859.1124       | 9.1          |
| b22                             | 1930.1325         | 1930.1499       | 9.0          |

**Table S6.** Data Collection, phasing, refinement statistics.

|                                                    | Native                     | SeMet                   |
|----------------------------------------------------|----------------------------|-------------------------|
| <b>Data collection</b>                             |                            |                         |
| Space Group                                        | P3 <sub>2</sub> 21         | P3 <sub>2</sub> 21      |
| Cell: a, b, c (Å)                                  | 115.8, 115.8, 71.3         | 116.6, 116.4, 71.5      |
| Resolution (Å) <sup>1</sup>                        | 100.2 – 2.01 (2.04 – 2.01) | 30.0 – 2.7 (2.75 – 2.7) |
| Total reflections                                  | 695657                     | 175179                  |
| Unique reflections                                 | 34750 (1825)               | 14123 (714)             |
| R <sub>merge</sub> (%) <sup>1</sup>                | 7.5 (130.4)                | 12.5 (139.5)            |
| CC1/2                                              | 0.999                      |                         |
| I/σ(I)                                             | 20.8 (2.3)                 | 21.4 (2.1)              |
| Completeness (%)                                   | 94.1 (99.4)                | 99.9 (100)              |
| Redundancy                                         | 20.0 (21.3)                | 12.4 (12.6)             |
| <b>Refinement</b>                                  |                            |                         |
| Resolution (Å)                                     | 25.0 – 2.01                |                         |
| No. reflections                                    | 33046                      |                         |
| R <sub>work</sub> / R <sub>free</sub> <sup>2</sup> | 20.9/24.4                  |                         |
| Number of atoms                                    |                            |                         |
| Protein                                            | 2391                       |                         |
| Ligand                                             | 26                         |                         |
| Solvent                                            | 83                         |                         |
| B-factors                                          |                            |                         |
| Protein                                            | 70.2                       |                         |
| Ligand                                             | 72.7                       |                         |
| Solvent                                            | 63.6                       |                         |
| R.M.S. deviations                                  |                            |                         |
| Bond lengths (Å)                                   | 0.010                      |                         |
| Bond angles (°)                                    | 1.52                       |                         |

1. Highest resolution shell is shown in parentheses. 2. R-work =  $\Sigma(|F_{\text{obs}}| - k|F_{\text{calc}}|) / \Sigma|F_{\text{obs}}|$  and R-free is the R value for a test set of reflections consisting of a random 5% of the diffraction data not used in refinement.

|         |     |                                                                                                   |     |
|---------|-----|---------------------------------------------------------------------------------------------------|-----|
| LctM    | 1   | MKKKTYQFEKFLKNTF-----DQFSIK-----QNEVLVEDDLNDII-----                                               | 36  |
| CylM    | 1   | MEDNLINVLINERCFLKQSGNEKYDKNLQAWKERKSVLKQDDLDYLYKYKYESLDNFGLGITPIENFPDKEVAIQYI                     | 80  |
| LahM1   | 1   | --MKQNEFYDYISDHGPL----GFLDKAGQI-----VSDLIE-----KNGP-----I                                         | 37  |
| LahM2   | 1   | MNLTQKQWLELFDGGCT----EALRSRSAQI-----V-EMIR-----SRTG-----N                                         | 38  |
|         |     |                                                                                                   |     |
| LctM    | 37  | -----MNV-----GKALVLM                                                                              | 47  |
| CylM    | 81  | KDQSWYIFFESILDSYNDSEQLLEVDASYPFRYFLQYARLFLDLNSELNICTKEFIINLLEILTQELIHLSKTLVLD                     | 160 |
| LahM1   | 38  | KS-----FLTGDFTA-----G-MRRSYKERMVPVY-----LRTVGEQLLQN                                               | 72  |
| LahM2   | 39  | AD-----RLLSIQSA-----DDIKVIFYDRLCDIY-----IGCFTELLSLE                                               | 74  |
|         |     |                                                                                                   |     |
| LctM    | 48  | INEKREMNLL-MGNTPEERYQ---YFENEYSSTGKAFEEIKDKFPVIYIDLKNSINSYLKLVQIMKDFKDKDYSLLVERK                  | 123 |
| CylM    | 161 | LHTFKKNEPL-KGNDSSKRFI---YYLKKRFNSKKDIIAFYTCYPELMRITVVRMRYFLDNTKQMLIRVTEDELPSIQNCF                 | 236 |
| LahM1   | 73  | MRRLDPPGAI----DPTKAENEVVYRAMEEVKETFAYGYFDKNLPLLVPFVEMTENFRDSQDDFIKDFLANKQKIEKQL                   | 148 |
| LahM2   | 75  | MGEAEFAAEIVMSDSVTPRLQAVQALSDRLKEDADMIY--RRFPFLRDIEEKITANFIESEVLLLDRYALSKEEISEAI                   | 152 |
|         |     |                                                                                                   |     |
| 159     |     |                                                                                                   |     |
| LctM    | 124 | I---IEEHSTISTMKIKGDLHNGKAVIEITT--NKSCLIY <b>K</b> PKSLSNDVFFNNFLKYMDSFFIKEGKSTKYKENFYLVNTL        | 199 |
| CylM    | 237 | N--IQSSELNSISESQGDHSRGTVSTLTFSDGKKIVY <b>K</b> PKINSENKL-RDFFEFLNKEL-----EADIYIVKKV               | 304 |
| LahM1   | 149 | LGGKKIDRIMGYIGGGGDSHRHGRSVFGIK-TDAGSFFY <b>K</b> PHDCKLDKLYHTLISELFDNCTAA-----ADCV                | 215 |
| LahM2   | 153 | FGGRPSGRILSFLKQRIYSRQHGRFVQGIN-TEAGVIY <b>K</b> PHDCQVDALWRDIIMLGFSDITRA-----ADV                  | 219 |
|         |     |                                                                                                   |     |
| 247 261 |     |                                                                                                   |     |
| LctM    | 200 | DMKTYGWVEYVDKKPINSFEEARNYRKGIVLLSVAYTLNLTDLHFE <b>N</b> VISQGENPCIIDL <b>E</b> TMFNMPM--FVKDYKNES | 277 |
| CylM    | 305 | TRNTYFEEYIDNIEINNIIEVKKYERYGKLGIAFLFNVDLHYE <b>N</b> IAHGEYPVVID <b>E</b> TFQOQNI--PI-EFGNSA      | 381 |
| LahM1   | 216 | TGDCGCVSELRIKETEQQGDIRTYHNFGLTALFYGIGAVDMHFD <b>N</b> IIPAGVVRPCAI <b>D</b> TMFPELRSFSKKGVT       | 295 |
| LahM2   | 220 | WGKYGFCKEIKAEPLDINDARLYFFRGALTAVLSVLGSDIHKN <b>N</b> IMACGAWPVLID <b>E</b> NLITPE--AGLSDVMNRT     | 297 |
|         |     |                                                                                                   |     |
| LctM    | 278 | RNIIN-KGIMDSVVSTGMLPVLGIDSLF----GGDPGILGGTFSKEERV--IINPFRDDIKFQKIVVRSVFKDHPFF                     | 349 |
| CylM    | 382 | TVDAK-YKYLDSIMVTGLVPLYLAMKDKSDKDEGVNLSALNFKEQSVPPKILIKINTFTDEMRFYQTHIMDTAKNTPIM                   | 460 |
| LahM1   | 296 | AADSRNFSFAYTVLRTMVLPRYTRKTGI-----ISPLYHSTGSG-----HLPRY                                            | 340 |
| LahM2   | 298 | AADIR---IYESVLRMGTLP-----VRKCFEPYAASALYKD---GEEGCSLPW                                             | 340 |
|         |     |                                                                                                   |     |
| LctM    | 350 | NNNEKRYCKPKDYVNDIIGKFEKTYKIIIVKNKEKILGFLKKESSSVTCRILFRNTMEYSVLLNAKSPVYSN---KREE                   | 426 |
| CylM    | 461 | NNEKISFI----SYEKYIVTGKMSILMKAKDSKKKILAYINNQLNLIVRNVIRPTQRYADMLEFSYHPNCFNSAIEREK                   | 536 |
| LahM1   | 341 | AGNDYTV-----GYEEDFITGFEEGYIRVQTRKRRIEEMFLS-FEDAEALRYLLRNTEYYNLMRQMLWRPKALSDKAEQRR                 | 415 |
| LahM2   | 341 | QGNITDVS----GYEQQFMDGFSSEGYRMLRLEDIQKLLGG-YPMELRVLVNSPKVQGYFCDKYLSPECLSKREKQRN                    | 415 |
|         |     |                                                                                                   |     |
| LctM    | 427 | IFEKLSFTNRGLGNDI----IKSEISQINTLIPYFNCQVDSNLIKNDM--GETIFE-HTLTFFKFLSKYRRLCVDME                     | 499 |
| CylM    | 537 | VLHNWMAYPYK-NKKV---VHYEFDLIDGDIPFYNNISKTSLIASD--GCLVEDFYQESALNRCLNKINDLCEDEIS                     | 609 |
| LahM1   | 416 | ILDRLRTPPTHNNYDVEGIVKYECELEGGDIPYYSTLGDYDLGSSPDQKISCGAFKESARRAAFKTLEIFGEEDKR                      | 495 |
| LahM2   | 416 | VMRDEFALRRRGRKRVPEILDYEEMCYLEGDIPYCVRLNEESLYGTD-GKKLIEKEYRRTPYEYISSKREYCDKRL                      | 494 |
|         |     |                                                                                                   |     |
| LctM    | 500 | QQVKLIRFS----IQSQEQLFKDGEQFSLYKKQKGSQE-----DLLIAIN-----ELSSILENNAY-IGTSD                          | 556 |
| CylM    | 610 | IQTVWLEIA-----LN----IYNPYKIINDLKNQNSNKYIYTGLELNGKIQACQ-----KIEKKIFKRAI-FNKKT                      | 671 |
| LahM1   | 496 | FE-----TDTIRNSLRCSAVPVMQEEAWEIE-----KCD-----REVLD                                                 | 531 |
| LahM2   | 495 | MEEKLVRWAFEHALLDSDEQSAETECGSDMTETERDSADIDCGSTERESDSTIDICGSDVAEIKCDSGMTGEADPAGT                    | 574 |
|         |     |                                                                                                   |     |
| LctM    | 557 | DTINWMSLGIADN-----DQILFESLENDIY-KGISGIG-----LALLEYYE-F-----YPNINTKIKLKI                           | 611 |
| CylM    | 672 | NTVNWIDIKLDQD-----WNVGI--LNNMY-DGLPGIF-----IFYVALKY-ITKNHKYDYV-IECIKNSI                           | 728 |
| LahM1   | 532 | KDISKLLQDINDNIRESGIHSTGDRILFLTQTPDLADKYSGMACCSIDLRYFGTINRQGFYDPAIAEMSLRLISEKI                     | 611 |
| LahM2   | 575 | NEIAEIFEKINKE---KMITPDGRIFFLSASQDYVQGDWGMAPLQAEVTLFCGLVLR--TKLASLHTAAEELIKQCI                     | 648 |
|         |     |                                                                                                   |     |
| LctM    | 612 | YKNISKDFINTNNEPQNYGFYVGLIGEYSFLRKYEVF---HKTSSCNILKNILKDFTEPK-CQTIIPSDDVIAGEAGII                   | 687 |
| CylM    | 729 | YTIPESEDIL-----SAFFGKGLIYPLLVDYRLN---NDINSLNVAEIAMDLIEKKPINNGELKNWDIHGHSNII                       | 796 |
| LahM1   | 612 | EEWLQDEDELYIRATISQ--DIYGGIGALILGIDEMCSAG---NERAEN-IYDGLINLISDKKMYMIDSKK--SISKLAGLI                | 684 |
| LahM2   | 649 | CELNEKLAILEKEGIQD-NITAG---LRFYGGEMILAGLILKELSDDKICRRLGLCLTDKEDFNKLPG--ISNGYAGL                    | 722 |
|         |     |                                                                                                   |     |
| LctM    | 688 | IYISNLMN-----YLEYRDEIDILLKSLSNKIKESIA-----SYAHGNSGIATAFVHGKVKTK--NEKYLIKFI                        | 750 |
| CylM    | 797 | KVLLLLSE-----ITE---DEKYRKFLE---IFEKLSSEPYFNFRGFGHGYSYVHLLSKFNRIK-ANSLHLHKI                        | 861 |
| LahM1   | 685 | TALSLSRKGHSKKGKGLIKDAS-----QVLISF--LPDNDLDVLYLAYVGAAMSLSFRETGNKCEELAGWAFQCLRLY                    | 756 |
| LahM2   | 723 | IALCAVK---ADKSLITRYAD-----KLAAMK--ITDND-PFTGLAGLAFALAGEAAGDETCYVHSSQCFEKLLKGW                     | 790 |
|         |     |                                                                                                   |     |
| LctM    | 751 | HELWNLENSSKLRGWTDSRKVDSSYSQWCHGASGQAIARMWITVNKTA-----RFLSNSELIKVKKELGELIDI                        | 822 |
| CylM    | 862 | ESYFEEEPKN-----NSWCKGTGVELLATIELYD-----DNISNIDINKTIEYKN--                                         | 906 |
| LahM1   | 757 | NEKLCGWTGEVGFKWLFPV---SEYSPWIGLCACIGICSLRSVEGKLTALMETDSEIKPVSGEAKGLAEKVAELAAS                     | 832 |
| LahM2   | 791 | NERLQGWPKD-GVIQ--PQR---GCYA-----AGIGLCALLAMD-----VLAGDKRDSAMECLRKALRS                             | 843 |
|         |     |                                                                                                   |     |
| LctM    | 823 | LKKEGMYTDNFCFLCHGILGNLLILNTYQENFDNKNINLKNELNYYSVNCYGL-NKGWICGLGTEFYSYGLMTGISGIL                   | 901 |
| CylM    | 907 | -----KDCLEHGNAGTLEGLIQAKKDP---TYQYKKNLISYMLKYFEKNNTLKVAGSEYLESGLGFFVGISGVG                        | 974 |
| LahM1   | 833 | VMEENALRYRDSLYHGNAISVYFLNAGELGQPEITARGEDILHTMFLRYEKLVFHTSPEGIRDFFDVSYSFGVPGIG                     | 912 |
| LahM2   | 844 | EMNEEKLYRQDILENGNALRAAFLLKAASFFPEYDCKKRAGEIISAMITRKEKTNYSISSPDGMRNTFDMALFTGTLVG                   | 923 |
|         |     |                                                                                                   |     |
| LctM    | 902 | YGLIRQVKQKNNFVGLMPYVD                                                                             | 922 |
| CylM    | 975 | YELLRNLDSEIPNALLFEL--                                                                             | 993 |
| LahM1   | 913 | AAALAIAKKTKEELT-----                                                                              | 926 |
| LahM2   | 924 | AVMVLFLGWLSK-----                                                                                 | 935 |

Figure S1. Sequence alignment of LctM, CylM, LahM1 and LahM2. Conserved residues Lys159, Asn247, Glu261 in the dehydratase domain are highlighted.

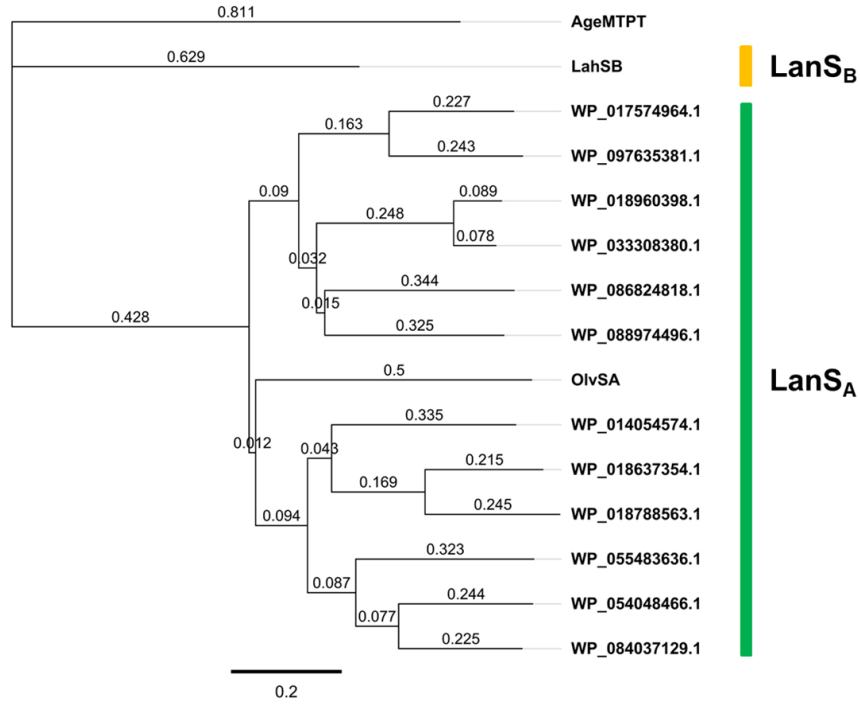

**Figure S2.** Protein-based phylogenetic tree of the sequences of LahSB, OlvSA,<sup>[6]</sup> AgeMTPT,<sup>[7]</sup> and 12 other LanSA homologs.

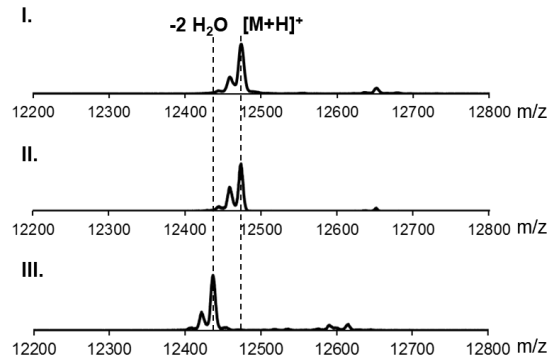

**Figure S3.** MALDI-TOF-MS results of *in vivo* co-expression of His-LahA3 peptide with LahM1 and LahM2. I) negative control: His-LahA3; II) His-LahA3 co-expressed with LahM2; III) His-LahA3 co-expressed with LahM1. The small shoulder peaks appearing to the left of each mass peak correspond to the laser-induced deamination of the parent peak. Deamination occurs as a consequence of analyzing large peptides using MALDI-TOF MS in reflective mode (see Extended Data Figure 6 in reference <sup>[8]</sup>).

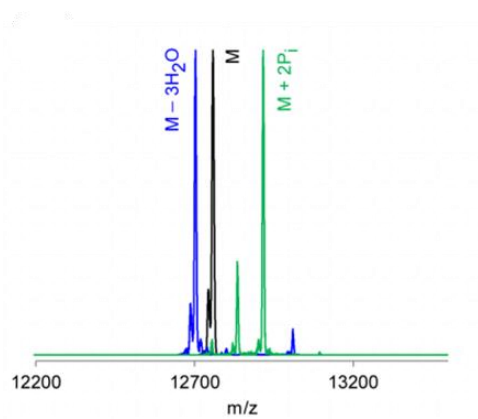

**Figure S4.** MALDI-TOF-MS results of co-expression of His-LahA5 peptide with LahM1 and LahM2 in *E. coli*. black line: His-LahA5; blue line: His-LahA5 co-expressed with LahM1; green line: His-LahA5 co-expressed with LahM2. The small shoulder peaks appearing to the left of each mass peak correspond to the laser-induced deamination of the parent peak. Deamination occurs as a consequence of analyzing large peptides using MALDI-TOF MS in reflective mode (see Extended Data Figure 6 in reference <sup>[8]</sup>).

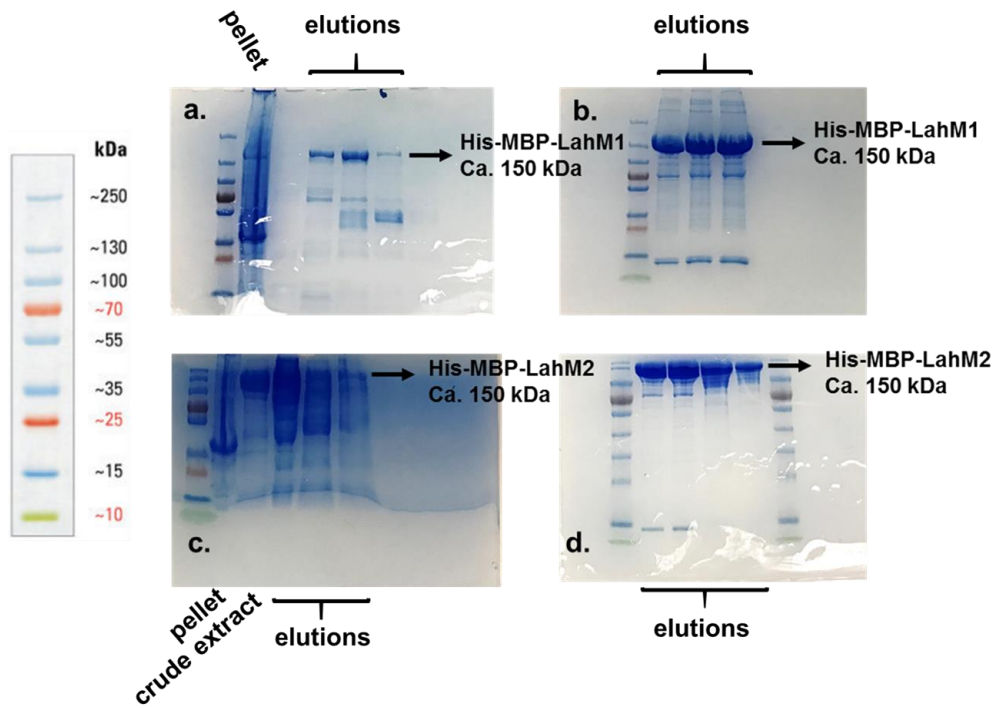

**Figure S5.** Coomassie-stained SDS-PAGE of purified His-MBP-LahM1 and His-MBP-LahM2. a) IMAC-purification of His-MBP-LahM1; b) SEC-purified His-MBP-LahM1; c) IMAC-purification of His-MBP-LahM2; d) SEC-purified His-MBP-LahM2.

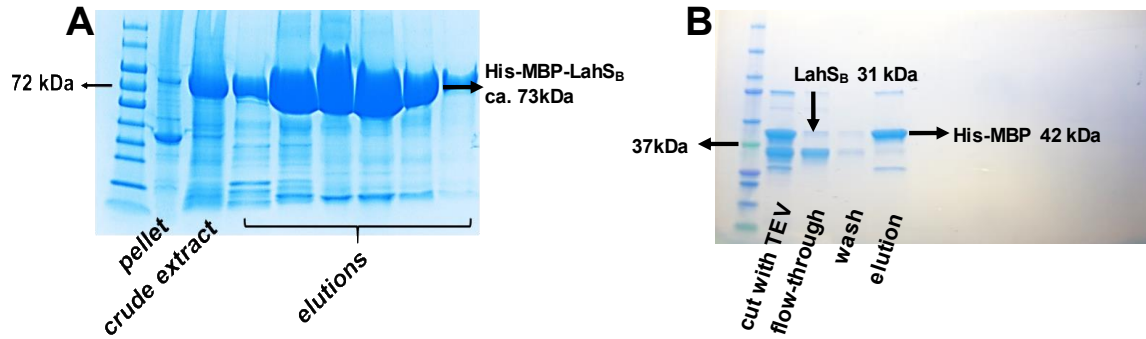

**Figure S6.** A) Coomassie-stained SDS-PAGE of IMAC purification of His-MBP-LahS<sub>B</sub>. B) Coomassie-stained SDS-PAGE of subtractive IMAC purification of tag-free LahS<sub>B</sub>.

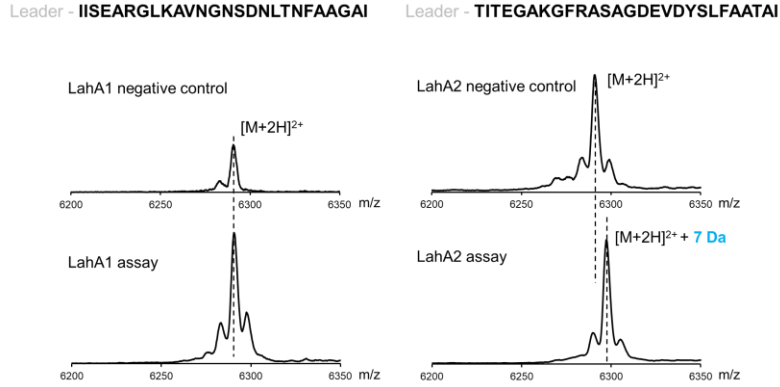

**Figure S7.** MALDI-TOF MS results of *in vitro* assays using His-MBP-LahS<sub>B</sub> with LahA1 and LahA2.

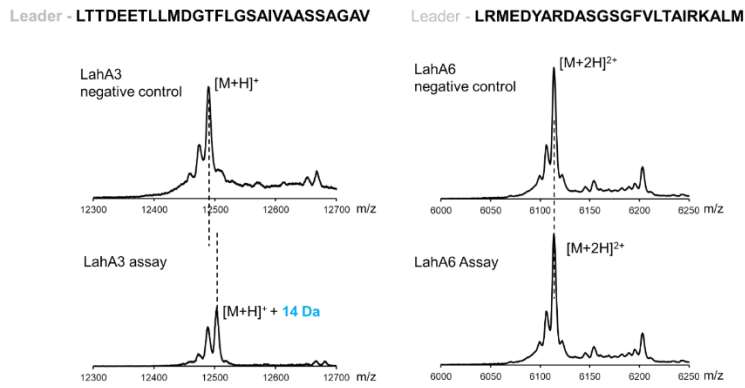

**Figure S8.** MALDI-TOF MS results of *in vitro* assays using His-MBP-LahS<sub>B</sub> with LahA3 and LahA6.

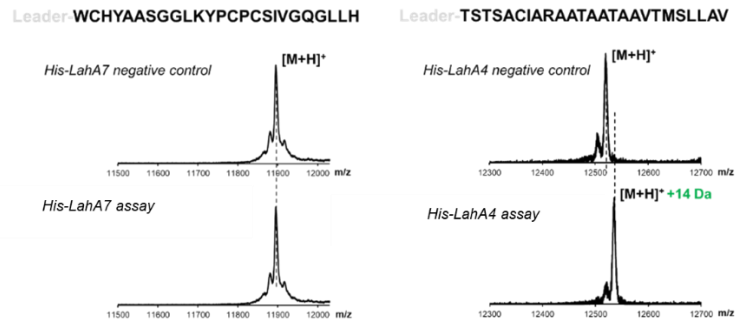

**Figure S9.** MALDI-TOF MS results of *in vitro* assays of His-MBP-LahS<sub>B</sub> with LahA4 and LahA7. The shoulder peaks appearing to the left of each mass peak correspond to the laser-induced deamination of the parent peak. Deamination occurs as a consequence of analyzing large peptides using MALDI-TOF MS in reflective mode (see Extended Data Figure 6 in reference [8])

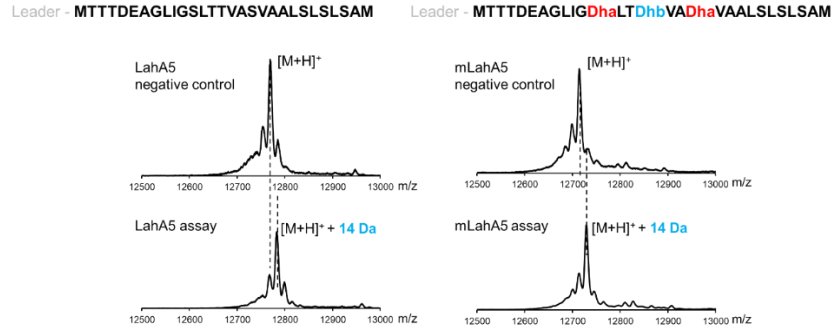

**Figure S10.** MALDI-TOF MS results of *in vitro* assays using His-MBP-LahS<sub>B</sub> against LahA5 and LahM1-modified LahA5.

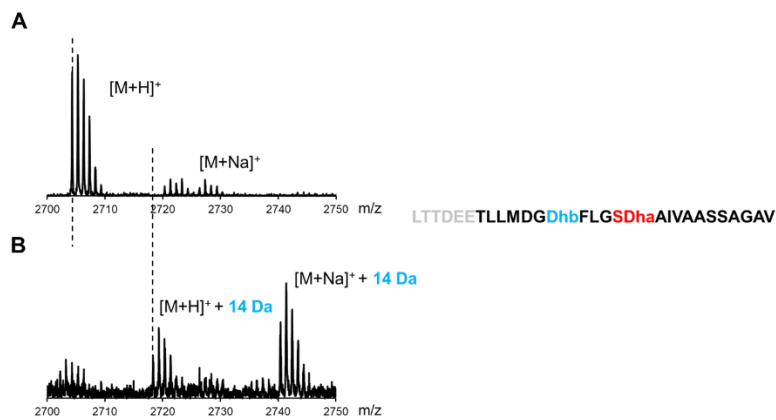

**Figure S11.** MALDI-TOF MS results of *in vitro* assays using His-MBP-LahS<sub>B</sub> against LahT150-treated mLahA3 peptide. (A) LahT150-treated mLahA3 peptide incubated with heat-inactivated enzyme; (B) LahT150-treated LahA3 peptide incubated with His-MBP-LahS<sub>B</sub>.

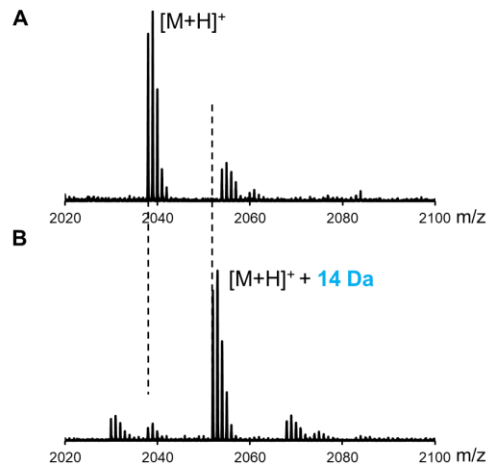

**Figure S12.** MALDI-TOF MS results of *in vitro* assays using His-MBP-LahS<sub>B</sub> against GluC-digested mLahA3 peptide. (A) GluC-modified mLahA3 peptide incubated with heat-inactivated enzyme; (B) GluC-modified LahA3 peptide incubated with His-MBP-LahS<sub>B</sub>.



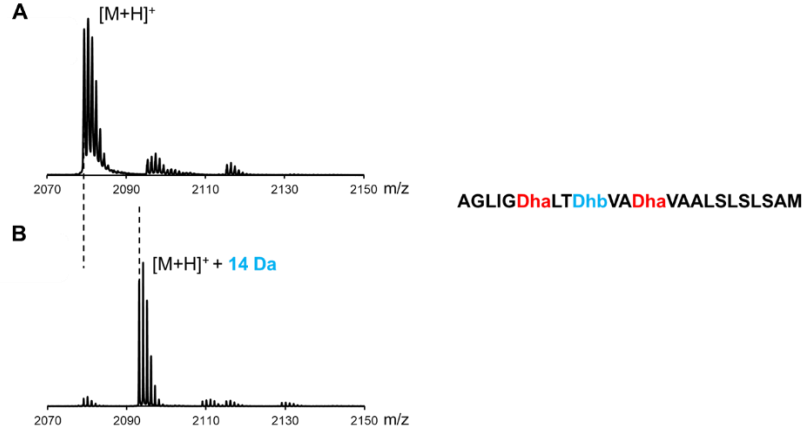

**Figure S13.** MALDI-TOF MS results of *in vitro* assays using His-MBP- Lah<sub>S<sub>B</sub></sub> against GluC-modified mLaHA5 peptide. (A) GluC-modified mLaHA5 peptide incubated with heat-inactivated enzyme; (B) GluC-modified LaHA5 peptide incubated with His-MBP- Lah<sub>S<sub>B</sub></sub>.

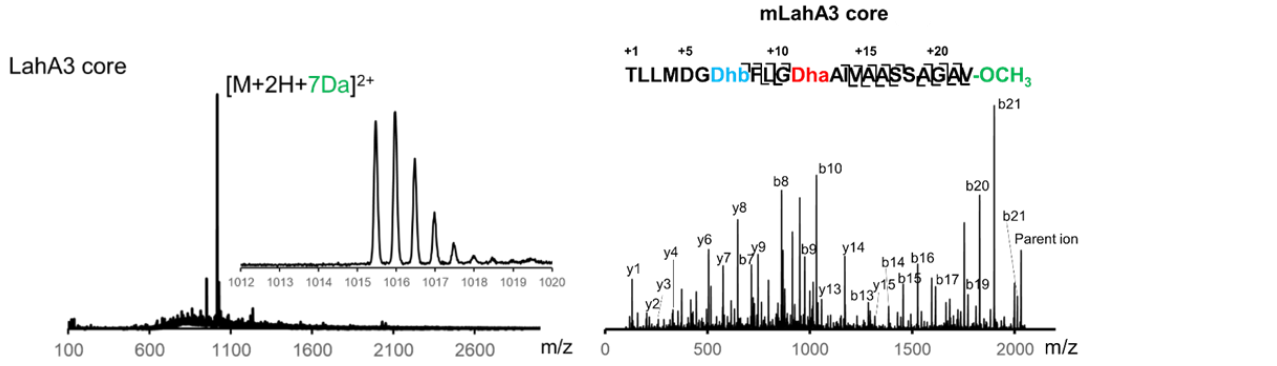

**Figure S14.** Tandem MS-MS of Lah<sub>S<sub>B</sub></sub>-modified mLaHA3 core peptide obtained by GluC treatment of mLaHA3 peptide.

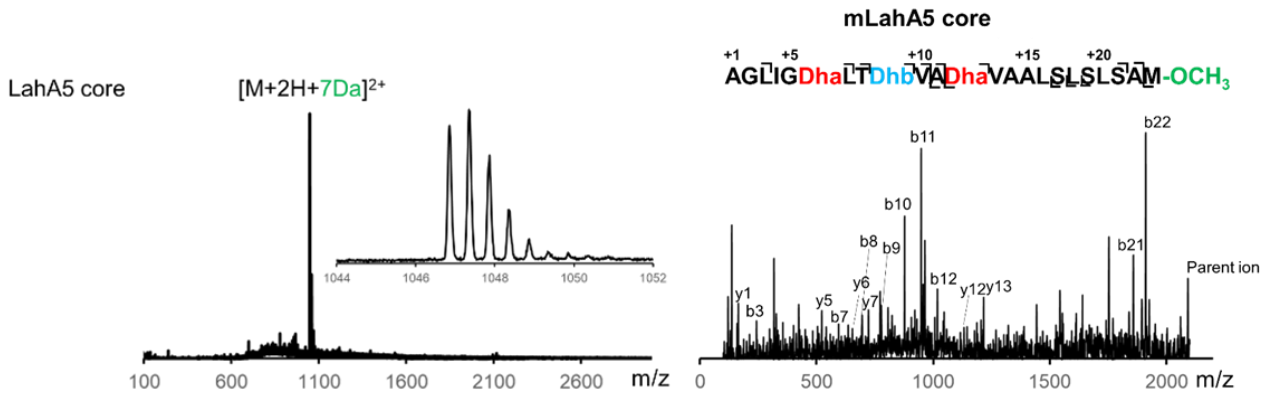

**Figure S15.** Tandem MS-MS of Lah<sub>S<sub>B</sub></sub>-modified mLaHA5 core peptide obtained by treatment of mLaHA5 with GluC.

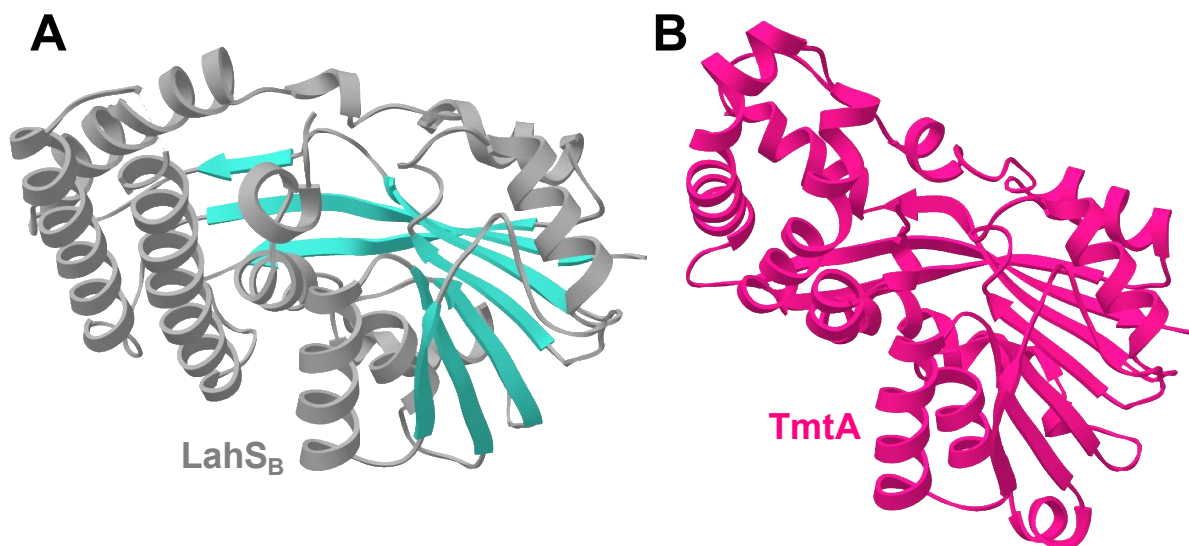

**Figure S16.** Comparison of the structure of (A) LahS<sub>B</sub> (B) and the *S*-methyltransferase TmtA (PDB: 5EGP).

## References

- [1] D. G. Gibson, L. Young, R. Y. Chuang, J. C. Venter, C. A. Hutchison, 3rd, H. O. Smith, *Nat. Methods* **2009**, *6*, 343-345.
- [2] X. Zhao, W. A. van der Donk, *Cell Chem. Biol.* **2016**, *23*, 246-256.
- [3] S. C. Bobeica, S. Dong, L. Huo, N. Mazo, M. I. H. McLaughlin, G. Jimenez-Oses, S. K. Nair, W. A. van der Donk, *eLife* **2019**, *8*.
- [4] X. Yang, W. A. van der Donk, *J. Am. Chem. Soc.* **2015**, *137*, 12426-12429.
- [5] B. Li, L. E. Cooper, W. A. van der Donk, *Methods Enzymol.* **2009**, *458*, 533-558.
- [6] J. Z. Acedo, I. R. Bothwell, L. An, A. Trouth, C. Frazier, W. A. van der Donk, **2019**, submitted for publication.
- [7] D. Sardar, Y. Hao, Z. Lin, M. Morita, S. K. Nair, E. W. Schmidt, *J. Am. Chem. Soc.* **2017**, *139*, 2884-2887.
- [8] M. A. Ortega, Y. Hao, Q. Zhang, M. C. Walker, W. A. van der Donk, S. K. Nair, *Nature* **2015**, *517*, 509-512.
